# Supplementary material for: Impact of Gastrointestinal Surgical Site Wound Complications on Long-term Healthcare Utilization
Source: Springer Nature journal article supplement (doi:10.1007/s11605-019-04489-2), 2020-01-28
Supplement: MOESM3 [file 17602472]

| **Supplemental Table 5: Cumulative Reoperations Data** | | | | | | | | | | | | | | | | |
| --- | --- | --- | --- | --- | --- | --- | --- | --- | --- | --- | --- | --- | --- | --- | --- | --- |
|  | **Overall** | | **No Infection** | | **Any Infection*** | | **P-Value** | **Superficial** | | **Dehiscence** | | **Deep Wound  Infection** | | **Organ Space SSI** | | **P-Value** |
| **Overall** | **64,351** |  | **56,471** | **87.8%** | **7,880** | **12.2%** |  | **3,250** | **5.1%** | **528** | **0.8%** | **655** | **1.0%** | **1,025** | **1.6%** |  |
| **Number of Reoperations, Mean (SD)** | | | | | | | | | | | | | | | | |
| 30-Day | 0 | (0.1) | 0.0 | (0.1) | 0.0 | (0.3) | <.001 | 0.0 | (0.1) | 0.1 | (0.3) | 0.1 | (0.5) | 0.1 | (0.4) | <.001 |
| 90-Day | 0 | (0.2) | 0.0 | (0.1) | 0.1 | (0.3) | <.001 | 0.0 | (0.2) | 0.2 | (0.5) | 0.2 | (0.6) | 0.1 | (0.5) | <.001 |
| 180-Day | 0 | (0.2) | 0.0 | (0.2) | 0.1 | (0.4) | <.001 | 0.1 | (0.3) | 0.2 | (0.6) | 0.2 | (0.7) | 0.1 | (0.5) | <.001 |
| 365-Day | 0.1 | (0.3) | 0.0 | (0.3) | 0.2 | (0.6) | <.001 | 0.1 | (0.5) | 0.3 | (0.7) | 0.3 | (0.9) | 0.2 | (0.7) | <.001 |
| 720-Day | 0.1 | (0.5) | 0.1 | (0.4) | 0.3 | (0.8) | <.001 | 0.2 | (0.7) | 0.4 | (0.8) | 0.5 | (1.2) | 0.3 | (0.8) | <.001 |
| **Any Reoperation, n (%)** | | | | | | | | | | | | | | | | |
| 30-Day | 385 | (0.6) | 122 | (0.2) | 263 | (3.3) | <.001 | 39 | (1.2) | 50 | (9.5) | 64 | (9.8) | 59 | (5.7) | <.001 |
| 90-Day | 830 | (1.3) | 438 | (0.8) | 392 | (5.0) | <.001 | 80 | (2.5) | 61 | (11.6) | 80 | (12.2) | 79 | (7.7) | <.001 |
| 180-Day | 1,406 | (2.2) | 869 | (1.5) | 537 | (6.8) | <.001 | 128 | (3.9) | 73 | (13.8) | 97 | (14.8) | 90 | (8.8) | <.001 |
| 365-Day | 2,766 | (4.3) | 1,916 | (3.4) | 850 | (10.8) | <.001 | 270 | (8.3) | 87 | (16.5) | 125 | (19.1) | 127 | (12.4) | <.001 |
| 720-Day | 4,562 | (7.1) | 3,391 | (6.0) | 1,171 | (14.9) | <.001 | 404 | (12.4) | 111 | (21.0) | 146 | (22.3) | 183 | (17.8) | <.001 |
| * Includes 2,420 (3.8%) infections that were not confirmed by VASQIP nurse and only documented in the ICD9 codes. 31% of all infections were not confirmed by a VASQIP nurse. | | | | | | | | | | | | | | | | |
